# Supplementary material for: Sequence analysis of the Hsp70 family in moss and evaluation of their functions in abiotic stress responses
Source: PubMed Central journal article supplement (PMC5028893; doi:10.1038/srep33650), 2016-09-20
Supplement: srep33650-s1.pdf [file srep33650-s1.pdf]

# Sequence analysis of the *Hsp70* family in moss and evaluation of their functions in abiotic stress responses

Ting Tang<sup>1,2,3&</sup>, Anmin Yu<sup>1,2,3,4&</sup>, Ping Li<sup>1,2,3</sup>, Hong Yang<sup>1,2,3</sup>, Gaojing Liu<sup>1,2,3</sup>, and Li Liu<sup>1,2,3\*</sup>

1. *Key Laboratory for Plant Diversity and Biogeography of East Asia, Kunming Institute of Botany, Chinese Academy of Sciences, Kunming, 650201, China*

2. *Key Laboratory of Economic Plants and Biotechnology, Kunming Institute of Botany, Chinese Academy of Sciences, Kunming, Yunnan 650201, China*

3. *Yunnan Key Laboratory for Wild Plant Resources, Kunming, Yunnan 650201, China*

4. *University of Chinese Academy of Sciences, Beijing, 100049, China*

& These authors contributed equally to this work.

\* Corresponding author, email: [liulia@mail.kib.ac.cn](mailto:liulia@mail.kib.ac.cn)

Address: 132 Lanhei Road, Kunming 650201, Yunnan, China

Fax number: +86 087165216952

**Table S1** The putative *Hsp70* genes in *P. patens*

|    | query id    | subject id           | % identity | alignment length | mismatches | gap opens | q. start | q. end | s. start | s. end | evaluate | bit score |
|----|-------------|----------------------|------------|------------------|------------|-----------|----------|--------|----------|--------|----------|-----------|
| 1  | AT5G02500.1 | Phpat.003G105300.1.p | 91.3       | 653              | 54         | 2         | 1        | 652    | 1        | 651    | 0        | 1219      |
| 2  | AT5G02500.1 | Phpat.011G003900.1.p | 90.4       | 653              | 58         | 3         | 1        | 652    | 1        | 649    | 0        | 1211      |
| 3  | AT5G02500.1 | Phpat.007G103800.1.p | 90.2       | 652              | 62         | 1         | 1        | 652    | 1        | 650    | 0        | 1208      |
| 4  | AT5G02500.1 | Phpat.007G084200.1.p | 90.2       | 652              | 61         | 2         | 1        | 652    | 1        | 649    | 0        | 1204      |
| 5  | AT5G02500.1 | Phpat.011G025600.1.p | 89.7       | 652              | 64         | 1         | 1        | 652    | 1        | 649    | 0        | 1201      |
| 6  | AT5G02500.1 | Phpat.012G032000.1.p | 85         | 653              | 97         | 1         | 1        | 652    | 1        | 653    | 0        | 1130      |
| 7  | AT5G02500.1 | Phpat.004G083500.1.p | 84.5       | 652              | 99         | 1         | 1        | 652    | 1        | 650    | 0        | 1128      |
| 8  | AT5G02500.1 | Phpat.010G067200.1.p | 65.7       | 613              | 204        | 4         | 7        | 618    | 31       | 638    | 0        | 831       |
| 9  | AT5G02500.1 | Phpat.003G101600.1.p | 64.6       | 613              | 211        | 4         | 7        | 618    | 31       | 638    | 0        | 814       |
| 10 | AT5G02500.1 | Phpat.003G105200.1.p | 92.6       | 352              | 26         | 0         | 1        | 352    | 1        | 352    | 0        | 690       |
| 11 | AT5G02500.1 | Phpat.003G105200.1.p | 81.6       | 174              | 29         | 2         | 477      | 649    | ##       | 520    | 0        | 277       |
| 12 | AT5G02500.1 | Phpat.007G102300.1.p | 56.1       | 508              | 215        | 5         | 8        | 510    | 9        | 513    | 0        | 591       |
| 13 | AT5G02500.1 | Phpat.011G026700.1.p | 54.7       | 499              | 219        | 5         | 9        | 502    | 10       | 506    | 0        | 561       |
| 14 | AT5G02500.1 | Phpat.002G053100.1.p | 50.4       | 595              | 268        | 11        | 2        | 590    | 47       | 620    | 0        | 561       |
| 15 | AT5G02500.1 | Phpat.001G091100.1.p | 50.1       | 605              | 273        | 12        | 2        | 600    | 45       | 626    | 0        | 561       |
| 16 | AT5G02500.1 | Phpat.001G091000.1.p | 50.1       | 605              | 273        | 12        | 2        | 600    | 45       | 626    | 0        | 561       |
| 17 | AT5G02500.1 | Phpat.002G052800.1.p | 50.1       | 595              | 270        | 11        | 2        | 590    | 49       | 622    | 0        | 557       |
| 18 | AT5G02500.1 | Phpat.007G061800.1.p | 49.7       | 578              | 270        | 9         | 10       | 582    | 82       | 643    | 0        | 538       |
| 19 | AT5G02500.1 | Phpat.007G061900.1.p | 49.7       | 578              | 270        | 9         | 10       | 582    | 82       | 643    | 0        | 538       |
| 20 | AT5G02500.1 | Phpat.007G061700.1.p | 49.7       | 578              | 270        | 9         | 10       | 582    | 82       | 643    | 0        | 538       |
| 21 | AT5G02500.1 | Phpat.026G035400.1.p | 47         | 640              | 311        | 12        | 10       | 642    | 80       | 698    | 0        | 538       |
| 22 | AT5G02500.1 | Phpat.004G105700.2.p | 47.5       | 646              | 292        | 15        | 10       | 643    | 78       | 688    | 0        | 532       |
| 23 | AT5G02500.1 | Phpat.004G105700.1.p | 47.5       | 646              | 292        | 15        | 10       | 643    | 78       | 688    | 0        | 532       |
| 24 | AT5G02500.1 | Phpat.004G105700.3.p | 47.5       | 646              | 292        | 15        | 10       | 643    | 78       | 688    | 0        | 532       |
| 25 | AT5G02500.1 | Phpat.003G001400.1.p | 53.5       | 508              | 215        | 6         | 10       | 507    | 11       | 507    | 0        | 516       |
| 26 | AT5G02500.1 | Phpat.020G074800.1.p | 35.6       | 410              | 260        | 3         | 10       | 418    | 4        | 410    | 0        | 280       |
| 27 | AT5G02500.1 | Phpat.010G079900.1.p | 31.3       | 543              | 339        | 9         | 10       | 535    | 4        | 529    | 0        | 278       |
| 28 | AT5G02500.1 | Phpat.024G005800.1.p | 32.9       | 410              | 253        | 4         | 10       | 418    | 4        | 392    | 0        | 247       |
| 29 | AT5G02500.1 | Phpat.014G073900.1.p | 27.3       | 521              | 342        | 8         | 7        | 494    | 27       | 543    | 0        | 226       |

**Table S2** *Hsp70* gene families in *P. patens*

| Gene Name    | Locus            | Genomic position             | Length (aa) | pI   | MW (kDa) | Subcellular localization predictions |
|--------------|------------------|------------------------------|-------------|------|----------|--------------------------------------|
| PpmtHsp70-2  | Phpat.001G091000 | Chr01:17,126,371..17,130,194 | 676         | 6.19 | 72       | mitochondrion                        |
| PpmtHsp70-3  | Phpat.001G091100 | Chr01:17,133,788..17,136,541 | 676         | 6.19 | 72       | mitochondrion                        |
| PpmtHsp70-1  | Phpat.002G052800 | Chr02:8,149,392..8,153,094   | 680         | 5.94 | 73       | mitochondrion                        |
| PpmtHsp70-4  | Phpat.002G053100 | Chr02:8,196,411..8,199,708   | 678         | 5.82 | 72       | mitochondrion                        |
| PpHsp70-BiP1 | Phpat.003G101600 | Chr03:17,656,022..17,658,623 | 662         | 5.07 | 73       | ER                                   |
| PpcHsp70-1   | Phpat.003G105200 | Chr03:18,198,892..18,201,354 | 520         | 5.16 | 57       | cytoplasm                            |
| PpcHsp70-2   | Phpat.003G105300 | Chr03:18,246,365..18,248,697 | 650         | 5.12 | 71       | cytoplasm                            |
| PpcHsp70-3   | Phpat.004G083500 | Chr04:14,397,874..14,400,506 | 660         | 5.07 | 72       | cytoplasm                            |
| PpcpHsp70-2  | Phpat.004G105700 | Chr04:19,181,152..19,189,094 | 707         | 5.4  | 76       | chloroplast                          |
| PpcpHsp70-3  | Phpat.007G061700 | Chr07:10,405,881..10,409,515 | 714         | 5.25 | 76       | chloroplast                          |
| PpcpHsp70-4  | Phpat.007G061800 | Chr07:10,424,865..10,428,592 | 714         | 5.25 | 76       | chloroplast                          |
| PpcpHsp70-5  | Phpat.007G061900 | Chr07:10,453,098..10,456,825 | 714         | 5.25 | 76       | chloroplast                          |
| PpcHsp70-4   | Phpat.007G084200 | Chr07:15,180,727..15,183,782 | 648         | 5.13 | 71       | cytoplasm                            |
| PpcHsp70-5   | Phpat.007G102300 | Chr07:17,602,178..17,604,100 | 518         | 5.48 | 58       | cytoplasm                            |
| PpcHsp70-6   | Phpat.007G103800 | Chr07:17,790,078..17,793,122 | 649         | 5.13 | 71       | cytoplasm                            |
| PpHsp70-BiP2 | Phpat.010G067200 | Chr10:11,770,163..11,772,910 | 662         | 5.12 | 73       | ER                                   |
| PpcHsp70-7   | Phpat.011G003900 | Chr11:467,447..470,376       | 648         | 5.19 | 71       | cytoplasm                            |
| PpcHsp70-8   | Phpat.011G025600 | Chr11:4,177,991..4,181,113   | 648         | 5.09 | 71       | cytoplasm                            |
| PpcHsp70-9   | Phpat.011G026700 | Chr11:4,434,823..4,436,556   | 509         | 5.28 | 57       | cytoplasm                            |
| PpcHsp70-10  | Phpat.012G032000 | Chr12:17,115,540..17,435,539 | 652         | 5.42 | 71       | cytoplasm                            |
| PpcpHsp70-1  | Phpat.026G035400 | Chr26:6,686,993..6,690,627   | 710         | 5.25 | 76       | chloroplast                          |

**Table S3** Multilevel consensus sequences of MEME-derived motifs

| Motif | Width(aa) | E-value   | Best possible match                                  |
|-------|-----------|-----------|------------------------------------------------------|
| 1     | 50        | 1.5e-685  | VKNAVVTVPAYFNDSQRQATK DAGRIAGLNVLRIINEPTCASIA YGMDRK |
| 2     | 41        | 1.4e-468  | HFYSTITRACFEELCMHMFRRCEMEPCEKCLRDAKMDYKDIH           |
| 3     | 41        | 1.5e-515  | NNLLGKFELSGIPPAPRGV PQIEVCFDIDANGILNVSAMDK           |
| 4     | 50        | 2.6e-632  | VQDILLLDVTPLSLCLLETMGGVMTRLIPRNTTIPTKKSQVFSTYHDNQPS  |
| 5     | 50        | 1.4e-660  | FDLGGGTFDVSLLTIEEGVFEVKATNGDTHLGGEDFDNRMVHHFVQEFKR   |
| 6     | 29        | 8.50E-278 | ERLIGDAAKNQVAMNPTNTFFDVKRLIGR                        |
| 7     | 41        | 8.1e-390  | KYGKDISSHPRALQRLREAAERAKRELSSTHQTTIEIPFLY            |
| 8     | 44        | 4.2e-388  | KDEIEKMQEAEKYKQEDEEHKKKIDAKNHLENYMYNMRNQIKE          |
| 9     | 21        | 4.00E-190 | GIDLGTTYSCVGVWQHDHHEI                                |
| 10    | 29        | 5.0e-316  | CEFEKMFEPPEEICNMVLIKMYQIAEAYL                        |
| 11    | 29        | 6.90E-287 | FNGKEPCKSINPDECVA YGAAVQAGILSG                       |
| 12    | 15        | 5.50E-159 | EVVLVGGSTRIPKVQ                                      |
| 13    | 15        | 4.90E-141 | NDQGNRTTPSWVAFT                                      |
| 14    | 21        | 2.50E-134 | RFSDPSVQSDMKMWPYKITPG                                |
| 15    | 15        | 5.90E-105 | VCIQVYQGEREMTRD                                      |
| 16    | 15        | 2.00E-100 | TGKKQKITITNDKGR                                      |
| 17    | 21        | 2.30E-95  | DKQKMEDAMEAAIQWLMQNQQ                                |
| 18    | 29        | 5.00E-68  | PEAQMMNQGGSSGPGAGGDQVIDAEYTD                         |
| 19    | 21        | 2.40E-46  | MASPCPWRHGSSLLHQRTGRA                                |
| 20    | 40        | 5.70E-32  | FSHRRNAFFGGDVKS RAGFGVEKLRAKSGGQCRRAHGPMR            |

**Table S4** Analysis of publicly available microarray data

| Gene name    | Spore     | Protonema | juv-Gam   | ad-Gam    | Gametophore | GeneName     | Control | Drought 3h | salt 3h | ABA 1h | ABA 3h | ABA 6h | GeneName     | Control | ABA 0.5 h | ABA 4.0 h | Dehydration 0.5 h | Dehydration 4.0 h | Salt 0.5 h | Salt 4.0 h |  |
|--------------|-----------|-----------|-----------|-----------|-------------|--------------|---------|------------|---------|--------|--------|--------|--------------|---------|-----------|-----------|-------------------|-------------------|------------|------------|--|
| PpcHsp70-10  | 8987.30   | 8115.46   | 6192.69   | 8741.27   | 8877.29     | OscHsp70-1   | 1.00    | 2.44       | 2.24    | 0.97   | 1.83   | 1.99   | PpmtHsp70-2  | 1.78    | 1.60      | 1.74      | 1.68              | 1.48              | 1.59       | 2.14       |  |
| PpcHsp70-2   | 41740.63  | 47802.56  | 220326.26 | 513464.29 | 173743.17   | OscHsp70-3   | 1.00    | 0.39       | 0.66    | 1.33   | 1.02   | 2.03   | PpmtHsp70-3  | 1.16    | 0.94      | 1.15      | 0.75              | 0.85              | 0.70       | 1.34       |  |
| PpcHsp70-3   | 8364.33   | 6826.23   | 11937.98  | 5118.35   | 7853.37     | OscHsp70-4   | 1.00    | 5.81       | 6.31    | 1.30   | 1.99   | 2.05   | PpmtHsp70-1  | 1.89    | 1.99      | 1.86      | 1.86              | 2.02              | 1.73       | 2.03       |  |
| PpcHsp70-4   | 9720.95   | 10168.49  | 9343.45   | 15995.28  | 10516.18    | OscHsp70-6   | 1.00    | 6.33       | 5.25    | 1.12   | 1.70   | 1.38   | PpmtHsp70-4  | 1.92    | 2.05      | 1.94      | 1.89              | 1.75              | 1.80       | 1.90       |  |
| PpcHsp70-6   | 40814.64  | 52893.46  | 102830.78 | 366837.27 | 45368.65    | OscHsp70-10  | 1.00    | 1.13       | 0.92    | 0.95   | 1.02   | 1.58   | PpcHsp70-2   | 1.92    | 2.68      | 1.88      | 2.63              | 2.53              | 2.53       | 2.26       |  |
| PpcHsp70-7   | 15605.72  | 11064.17  | 19031.63  | 35458.46  | 12422.05    | OsuHsp70-2   | 1.00    | 0.55       | 0.72    | 0.26   | 0.52   | 1.32   | PpcHsp70-2   | 0.79    | 1.47      | 0.92      | 1.41              | 1.86              | 1.52       | 1.60       |  |
| PpcHsp70-8   | 29869.08  | 14692.26  | 12210.92  | 44984.12  | 12231.88    | OsHsp70-BiP2 | 1.00    | 4.41       | 3.03    | 1.17   | 1.25   | 1.08   | PpcHsp70-5   | 2.32    | 1.75      | 2.30      | 1.65              | 1.89              | 1.81       | 2.12       |  |
| PpcHsp70-1   | 11370.54  | 9461.38   | 14308.66  | 22323.82  | 9269.16     | OsHsp70-BiP4 | 1.00    | 0.70       | 0.36    | 1.04   | 1.14   | 2.34   | PpcHsp70-4   | 2.74    | 2.36      | 2.74      | 2.11              | 2.47              | 2.04       | 2.44       |  |
| PpcHsp70-2   | 25116.21  | 52482.66  | 55513.81  | 47819.97  | 27103.15    | OsmHsp70-2   | 1.00    | 0.94       | 1.45    | 1.22   | 1.90   | 2.04   | PpcHsp70-6   | 2.69    | 2.43      | 2.69      | 2.28              | 2.76              | 2.38       | 2.56       |  |
| PpcHsp70-3   | 80475.52  | 66713.18  | 74968.55  | 209053.21 | 118244.21   | OscpHsp70-1  | 1.00    | 0.68       | 0.68    | 1.12   | 1.81   | 1.80   | PpHsp70-BiP2 | 2.27    | 1.79      | 2.22      | 1.50              | 2.21              | 1.94       | 2.09       |  |
| PpHsp70-BiP1 | 6911.30   | 8477.26   | 4329.52   | 5836.64   | 7456.21     | OsHsp110-1   | 1.00    | 1.66       | 1.33    | 1.18   | 1.80   | 1.78   | PpcHsp70-7   | 0.70    | 0.09      | 0.64      | -0.25             | 0.83              | -0.20      | 0.29       |  |
| PpHsp70-BiP2 | 189599.61 | 353522.73 | 254492.57 | 330581.42 | 60652.69    | OsHsp110-2   | 1.00    | 0.80       | 0.75    | 1.88   | 2.20   | 1.40   | PpcHsp70-8   | 1.88    | 1.95      | 1.84      | 1.91              | 1.81              | 1.36       | 1.69       |  |
| PpmtHsp70-1  | 94321.29  | 58401.52  | 64240.77  | 58249.13  | 25193.28    | OsHsp110-3   | 1.00    | 0.99       | 1.20    | 1.32   | 1.70   | 1.83   | PpcHsp70-1   | 1.44    | 1.15      | 1.45      | 0.88              | 1.38              | 1.01       | 1.79       |  |
| PpmtHsp70-2  | 10785.35  | 10240.76  | 11252.01  | 21758.31  | 9792.31     | OsHsp110-4   | 1.00    | 0.64       | 0.69    | 1.61   | 1.96   | 1.88   |              |         |           |           |                   |                   |            |            |  |
| PpmtHsp70-3  | 10785.35  | 10240.76  | 11252.01  | 21758.31  | 9792.31     | OsHsp110-5   | 1.00    | 7.86       | 3.36    | 0.98   | 1.05   | 1.58   |              |         |           |           |                   |                   |            |            |  |
| PpmtHsp70-4  | 14439.15  | 9490.34   | 11632.99  | 21308.01  | 9838.79     | OsHsp110-8   | 1.00    | 1.67       | 2.83    | 0.53   | 1.37   | 1.90   |              |         |           |           |                   |                   |            |            |  |

| Gene-name    | Control | Salt 0.5h | Salt 1h | Salt 3h | Salt 6h | Salt 12h | Salt 24h | Drought 0.25h | Drought 0.5h | Drought 1h | Drought 3h | Drought 6h | Drought 12h | Drought 24h | ABA 0.5h | ABA 1h | ABA 3h |
|--------------|---------|-----------|---------|---------|---------|----------|----------|---------------|--------------|------------|------------|------------|-------------|-------------|----------|--------|--------|
| AtcHsp70-1   | 1.00    | 0.72      | 0.70    | 0.64    | 0.79    | 1.31     | 1.37     | 1.02          | 0.93         | 0.89       | 0.78       | 0.61       | 1.05        | 0.95        | 1.05     | 1.00   | 0.80   |
| AtcHsp70-3   | 1.00    | 0.32      | 0.26    | 0.35    | 0.51    | 1.00     | 1.55     | 0.80          | 0.66         | 0.62       | 0.40       | 0.21       | 0.84        | 0.66        | 0.85     | 0.81   | 0.44   |
| AtcHsp70-4   | 1.00    | 0.27      | 0.10    | 0.17    | 0.35    | 0.74     | 4.40     | 0.36          | 0.25         | 0.29       | 0.32       | 0.12       | 0.21        | 0.28        | 0.05     | 0.21   | 1.86   |
| AtcHsp70-5   | 1.00    | 0.85      | 1.05    | 0.77    | 0.99    | 1.08     | 1.64     | 0.84          | 1.01         | 0.88       | 1.70       | 2.09       | 1.19        | 1.12        | 0.58     | 0.56   | 0.57   |
| AtcHsp70-6   | 1.00    | 0.88      | 0.82    | 0.52    | 0.41    | 0.60     | 0.79     | 0.98          | 0.93         | 1.01       | 0.83       | 0.57       | 0.82        | 0.77        | 0.62     | 0.56   | 0.44   |
| AtcHsp70-7   | 1.00    | 0.54      | 0.47    | 0.17    | 0.15    | 0.44     | 0.58     | 0.87          | 0.63         | 0.62       | 0.26       | 0.23       | 0.67        | 0.52        | 0.37     | 0.30   | 0.14   |
| AtcHsp70-8   | 1.00    | 0.76      | 0.77    | 0.71    | 0.68    | 0.76     | 1.89     | 0.65          | 0.68         | 0.67       | 0.66       | 0.80       | 0.60        | 0.81        | 0.24     | 0.21   | 0.19   |
| AtcHsp70-15  | 1.00    | 0.69      | 0.62    | 0.48    | 0.73    | 1.02     | 1.59     | 0.96          | 0.98         | 0.93       | 0.86       | 0.60       | 0.87        | 0.75        | 1.32     | 1.23   | 0.74   |
| AtcHsp70-16  | 1.00    | 1.09      | 1.16    | 0.96    | 1.18    | 1.06     | 1.16     | 0.82          | 0.95         | 0.77       | 1.09       | 1.39       | 1.21        | 0.77        | 1.63     | 1.72   | 1.54   |
| AtcHsp70-17  | 1.00    | 0.71      | 0.86    | 0.73    | 1.07    | 1.24     | 1.23     | 0.88          | 0.93         | 0.93       | 1.29       | 0.95       | 1.23        | 0.83        | 1.51     | 1.28   | 0.80   |
| AtcHsp70-18  | 1.00    | 1.10      | 1.20    | 1.08    | 1.06    | 1.07     | 1.23     | 1.10          | 1.00         | 1.01       | 0.94       | 1.04       | 0.97        | 1.18        | 1.07     | 1.07   | 1.05   |
| AtcpHsp70-1  | 1.00    | 0.88      | 0.82    | 0.52    | 0.41    | 0.60     | 0.79     | 0.98          | 0.93         | 1.01       | 0.83       | 0.57       | 0.82        | 0.77        | 0.62     | 0.56   | 0.44   |
| AtcpHsp70-2  | 1.00    | 0.54      | 0.47    | 0.17    | 0.15    | 0.44     | 0.58     | 0.87          | 0.63         | 0.62       | 0.26       | 0.23       | 0.67        | 0.52        | 0.37     | 0.30   | 0.14   |
| AtHsp70-BiP1 | 1.00    | 0.59      | 0.59    | 0.35    | 0.81    | 1.10     | 0.99     | 0.67          | 0.65         | 0.64       | 1.12       | 0.67       | 1.34        | 0.59        | 1.37     | 1.34   | 0.78   |
| AtHsp70-BiP3 | 1.00    | 0.67      | 0.65    | 0.64    | 0.68    | 0.55     | 1.35     | 0.68          | 0.55         | 0.55       | 0.85       | 0.62       | 0.78        | 0.63        | 0.59     | 0.69   | 0.50   |
| AtmHsp70-1   | 1.00    | 0.76      | 0.75    | 0.29    | 0.40    | 0.67     | 0.79     | 1.04          | 1.01         | 0.91       | 0.67       | 0.39       | 0.59        | 0.72        | 0.93     | 0.89   | 0.59   |
| AtmHsp70-2   | 1.00    | 0.54      | 0.44    | 0.50    | 0.55    | 1.01     | 2.33     | 0.71          | 0.75         | 0.77       | 0.79       | 0.47       | 0.63        | 0.68        | 1.25     | 1.36   | 1.07   |











**Table S6** *Cis*-element of *Hsp70* gene families under different cellular locations and treatments.

| Cellular localization | Number        | Sequence      | Name        | E-value  |
|-----------------------|---------------|---------------|-------------|----------|
| Cytoplasm             | C1-1          | CTCCCTCTTC    | NODCON2GM   | 7.30E-03 |
|                       | C2-1          | GGGGCGGCGG    | GCCCORE     | 3.50E-35 |
|                       | C2-2          | AAAAAAAAA     | None        | 2.30E-08 |
|                       | C2-3          | AGAGAGAGAG    | CTRMCAV35S  | 7.90E-06 |
|                       | C2-4          | CCCCGCCGCC    | GCCCORE     | 1.70E-02 |
|                       | C3-1          | TTTTTTTTTT    | MARTBOX     | 1.10E-10 |
|                       | C3-2          | GCCAGCCGCC    | AGCBOXNPGLB | 7.30E-04 |
|                       | C3-3          | GGCAGAGAAG    | None        | 6.40E-06 |
|                       | Mitochondrion | Mt-1          | GGCCGGCGGG  |          |
| Mt-2                  |               | TTTTTTTTTT    | MARTBOX     | 1.60E-07 |
| Chloroplast           | Cp-1          | GGTGGCGGGG    | SORLIP1AT   | 2.70E-10 |
|                       | Cp-2          | TTTTTTTTTT    | MARTBOX     | 5.80E-07 |
| ER ( Bi )             | Bi-1          | CGGCCGCGGC    | CGCBOXAT    | 6.60E-20 |
|                       | Bi-2          | AAAAAAAAAA    | MARTBOX     | 1.90E-16 |
|                       | Bi-3          | TGGTCCACGT    | ABRELATERD1 | 9.30E-04 |
|                       | Bi-4          | CTTCCTCTTC    | NODCON2GM   | 4.10E-03 |
| salt                  | Salt-1        | CCGCCGCCGCC   | GCCCORE     | 3.50E-22 |
|                       | Salt-2        | AAAAAAAAAAAA  | MARTBOX     | 7.30E-09 |
|                       | Salt-3        | AGAGAGAGGGG   | None        | 5.20E-04 |
| ABA                   | ABA-1         | GGGGAGGGGGAG  | None        | 3.00E-14 |
|                       | ABA-2         | AAAAAAAAAGAAA | DOFCOREZM   | 1.30E-14 |
| Drought               | Drought-1     | GGCGGAGGGGGG  | None        | 7.60E-19 |
|                       | Drought-2     | AAAAAAAAAAAA  | MARTBOX     | 5.40E-08 |
|                       | Drought-3     | CCCTCTCTCTCT  | CTRMCAV35S  | 2.40E-05 |
